# Supplementary material
Source: publisher figshare collection journal article supplement (https://acs.figshare.com/ndownloader/files/4733833)
Supplement: Supplementary file 1 [file 4733833]

## Supporting information

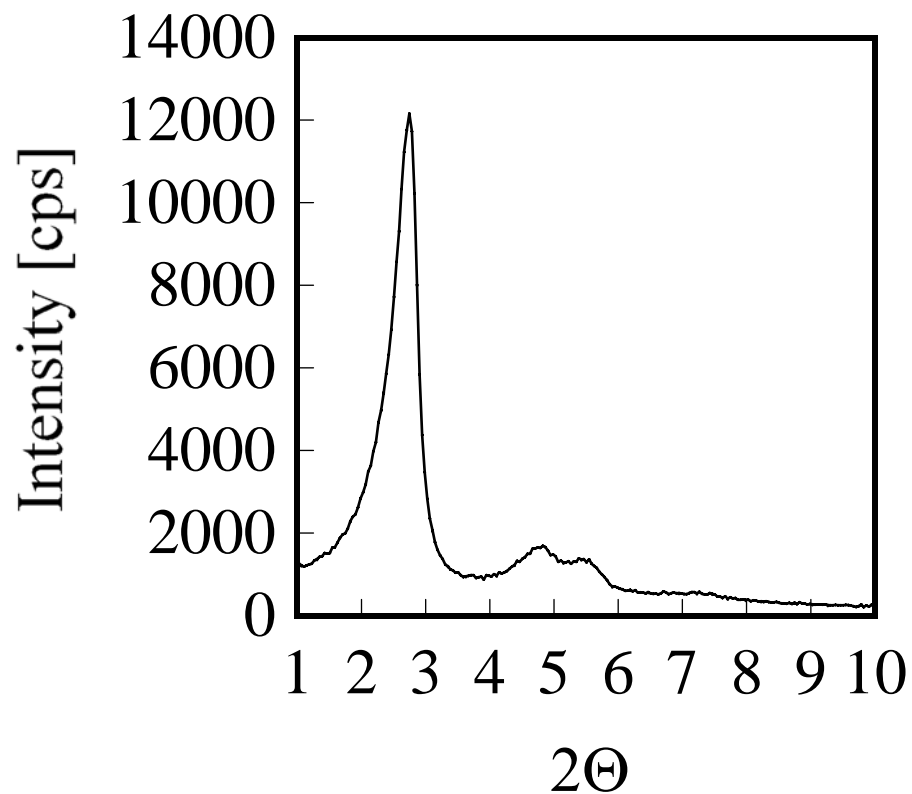

Figure S1. A powder XRD pattern of the particles that were obtained after 600 sec.
